# Supplementary material
Source: publisher site journal article supplement (https://www.dovepress.com/article/267584)
Supplement: Supplementary file 1 [file get_supplementary_file.php]

**Figure S1.** Kaplan-Meier breast cancer-specific survival curve of simulated cohort, null model

**Table S1.** Matched analysis 3 under simulated cohort of 3 million women, null model

|  | **Value** | **Total** | **Exposed** | **Unexposed** | **P-value** |
| --- | --- | --- | --- | --- | --- |
|  |  | 2,727,074 | 1,363,537 (50.0%) | 1,363,537 (50.0%) |  |
| Randomized to receive mammogram | No | 1,335,970 (49.0%) | 0 (0.0%) | 1,335,970 (98.0%) | <.0001 |
| Yes | 1,391,104 (51.0%) | 1,363,537 (100.0%) | 27,567 (2.0%) |  |
| Number of mammograms | Mean (SD) | 7.5 (2.0) | 7.5 (2.0) | – | n/a |
|  | Median (IQR) | 8.0 (6.0-9.0) | 8.0 (6.0-9.0) | – |  |
|  | None | 1,363,537 (50.0%) | 0 (0.0%) | 1,363,537 (100.0%) | n/a |
|  | 1 | 21,935 (0.8%) | 21,935 (1.6%) | 0 (0.0%) |  |
|  | 2 | 24,929 (0.9%) | 24,929 (1.8%) | 0 (0.0%) |  |
|  | 3 | 27,615 (1.0%) | 27,615 (2.0%) | 0 (0.0%) |  |
|  | 4 | 31,346 (1.1%) | 31,346 (2.3%) | 0 (0.0%) |  |
|  | 5 | 35,266 (1.3%) | 35,266 (2.6%) | 0 (0.0%) |  |
|  | 6 | 258,585 (9.5%) | 258,585 (19.0%) | 0 (0.0%) |  |
|  | 7 | 252,664 (9.3%) | 252,664 (18.5%) | 0 (0.0%) |  |
|  | 8 | 245,250 (9.0%) | 245,250 (18.0%) | 0 (0.0%) |  |
|  | 9 | 238,174 (8.7%) | 238,174 (17.5%) | 0 (0.0%) |  |
|  | 10 | 227,773 (8.4%) | 227,773 (16.7%) | 0 (0.0%) |  |
| Age at first mammogram | Mean (SD) | 54.9 (2.9) | 54.9 (2.9) | – | n/a |
| Median (IQR) | 54.9 (52.4-57.4) | 54.9 (52.4-57.4) | – |  |
| Age at last mammogram | Mean (SD) | 67.8 (3.2) | 67.8 (3.2) | – | n/a |
| Median (IQR) | 68.8 (68.2-69.4) | 68.8 (68.2-69.4) | – |  |
| Incident breast cancer | No | 2,489,409 (91.3%) | 1,250,871 (91.7%) | 1,238,538 (90.8%) | <.0001 |
| Yes | 237,665 (8.7%) | 112,666 (8.3%) | 124,999 (9.2%) |  |
| Mammogram detected breast cancer | No | 182,314 (76.7%) | 57,315 (50.9%) | 124,999 (100.0%) | n/a |
| Yes | 55,351 (23.3%) | 55,351 (49.1%) | 0 (0.0%) |  |
| Age at BC diagnosis | Mean (SD) | 66.3 (7.6) | 67.0 (7.3) | 65.6 (7.9) | <.0001 |
| Median (IQR) | 66.4 (60.2-72.6) | 66.9 (61.4-73.1) | 65.8 (59.0-72.2) | <.0001 |
| 50-54 | 19,468 (8.2%) | 5,623 (5.0%) | 13,845 (11.1%) | <.0001 |
| 55-59 | 38,020 (16.0%) | 16,130 (14.4%) | 21,890 (17.5%) |  |
| 60-64 | 47,158 (19.9%) | 24,291 (21.6%) | 22,867 (18.3%) |  |
| 65-69 | 50,287 (21.2%) | 25,539 (22.8%) | 24,748 (19.8%) |  |
| 70-74 | 44,333 (18.7%) | 21,182 (18.9%) | 23,151 (18.5%) |  |
| 75-79 | 37,954 (16.0%) | 19,456 (17.3%) | 18,498 (14.8%) |  |
| Death from breast cancer | No | 2,686,361 (98.5%) | 1,344,889 (98.6%) | 1,341,472 (98.4%) | <.0001 |
| Yes | 40,713 (1.5%) | 18,648 (1.4%) | 22,065 (1.6%) |  |
| Age at BC death | Mean (SD) | 69.1 (6.8) | 69.9 (6.4) | 68.4 (7.1) | <.0001 |
| Median (IQR) | 69.8 (64.1-74.8) | 70.6 (65.4-75.2) | 69.0 (62.8-74.4) | <.0001 |
| Time from BC diagnosis to BC death | Mean (SD) | 5.3 (4.4) | 5.4 (4.3) | 5.2 (4.5) | 0.0001 |
| Median (IQR) | 3.9 (1.9-7.6) | 4.1 (2.1-7.6) | 3.8 (1.8-7.5) | <.0001 |
| Other cause of death | No | 1,735,630 (63.6%) | 876,849 (64.3%) | 858,781 (63.0%) | <.0001 |
| Yes | 991,444 (36.4%) | 486,688 (35.7%) | 504,756 (37.0%) |  |
| Age at other COD | Mean (SD) | 70.7 (7.2) | 71.3 (6.7) | 70.2 (7.6) | <.0001 |
| Median (IQR) | 72.5 (66.0-76.8) | 72.8 (66.8-76.9) | 72.2 (65.1-76.6) | <.0001 |
| Vital status | Alive | 1,694,917 (62.2%) | 858,201 (62.9%) | 836,716 (61.4%) | <.0001 |
| Breast | 40,713 (1.5%) | 18,648 (1.4%) | 22,065 (1.6%) |  |
| Other COD | 991,444 (36.4%) | 486,688 (35.7%) | 504,756 (37.0%) |  |
| Follow-up time | Mean (SD) | 21.5 (6.7) | 21.8 (6.4) | 21.2 (7.0) | <.0001 |
| Median (IQR) | 23.0 (20.0-26.3) | 23.1 (20.1-26.3) | 22.9 (19.5-26.2) | <.0001 |

**Table S2.** Matched analysis 4 under simulated cohort of 3 million women, null model

|  | **Value** | **Total** | **Exposed** | **Unexposed** | **P-value** |
| --- | --- | --- | --- | --- | --- |
|  |  | 2,727,592 | 1,363,796 (50.0%) | 1,363,796 (50.0%) |  |
| Randomized to receive mammogram | No | 941,113 (34.5%) | 0 (0.0%) | 941,113 (69.0%) | <.0001 |
| Yes | 1,786,479 (65.5%) | 1,363,796 (100.0%) | 422,683 (31.0%) |  |
| Number of mammograms | Mean (SD) | 7.3 (2.0) | 7.5 (2.0) | 6.6 (1.7) | <.0001 |
|  | Median (IQR) | 7.0 (6.0-9.0) | 8.0 (6.0-9.0) | 7.0 (6.0-8.0) |  |
|  | None | 951,149 (34.9%) | 0 (0.0%) | 951,149 (69.7%) | <.0001 |
|  | 1 | 29,194 (1.1%) | 21,940 (1.6%) | 7,254 (0.5%) |  |
|  | 2 | 33,432 (1.2%) | 24,936 (1.8%) | 8,496 (0.6%) |  |
|  | 3 | 36,836 (1.4%) | 27,625 (2.0%) | 9,211 (0.7%) |  |
|  | 4 | 42,029 (1.5%) | 31,353 (2.3%) | 10,676 (0.8%) |  |
|  | 5 | 47,501 (1.7%) | 35,273 (2.6%) | 12,228 (0.9%) |  |
|  | 6 | 403,624 (14.8%) | 258,675 (19.0%) | 144,949 (10.6%) |  |
|  | 7 | 355,639 (13.0%) | 252,745 (18.5%) | 102,894 (7.5%) |  |
|  | 8 | 313,038 (11.5%) | 245,297 (18.0%) | 67,741 (5.0%) |  |
|  | 9 | 275,740 (10.1%) | 238,179 (17.5%) | 37,561 (2.8%) |  |
|  | 10 | 239,410 (8.8%) | 227,773 (16.7%) | 11,637 (0.9%) |  |
| Age at first mammogram | Mean (SD) | 55.4 (2.9) | 54.9 (2.9) | 56.8 (2.3) | <.0001 |
| Median (IQR) | 55.6 (53.0-57.9) | 54.9 (52.4-57.4) | 57.3 (55.2-58.8) |  |
| Age at last mammogram | Mean (SD) | 67.9 (3.1) | 67.8 (3.2) | 68.1 (2.8) | <.0001 |
| Median (IQR) | 68.8 (68.2-69.4) | 68.8 (68.2-69.4) | 68.9 (68.3-69.5) |  |
| Incident breast cancer | No | 2,502,950 (91.8%) | 1,251,110 (91.7%) | 1,251,840 (91.8%) | 0.1079 |
| Yes | 224,642 (8.2%) | 112,686 (8.3%) | 111,956 (8.2%) |  |
| Mammogram detected breast cancer | No | 153,574 (68.4%) | 57,321 (50.9%) | 96,253 (86.0%) | <.0001 |
| Yes | 71,068 (31.6%) | 55,365 (49.1%) | 15,703 (14.0%) |  |
| Age at BC diagnosis | Mean (SD) | 67.1 (7.2) | 67.0 (7.2) | 67.3 (7.1) | <.0001 |
| Median (IQR) | 67.2 (61.6-73.1) | 66.9 (61.4-73.1) | 67.4 (61.8-73.1) | <.0001 |
| 50-54 | 10,082 (4.5%) | 5,623 (5.0%) | 4,459 (4.0%) | <.0001 |
| 55-59 | 31,550 (14.1%) | 16,133 (14.4%) | 15,417 (13.8%) |  |
| 60-64 | 48,062 (21.4%) | 24,297 (21.6%) | 23,765 (21.2%) |  |
| 65-69 | 51,468 (23.0%) | 25,544 (22.8%) | 25,924 (23.2%) |  |
| 70-74 | 44,137 (19.7%) | 21,187 (18.9%) | 22,950 (20.5%) |  |
| 75-79 | 38,786 (17.3%) | 19,457 (17.3%) | 19,329 (17.3%) |  |
| Death from breast cancer | No | 2,690,101 (98.6%) | 1,345,147 (98.6%) | 1,344,954 (98.6%) | 0.3155 |
| Yes | 37,491 (1.4%) | 18,649 (1.4%) | 18,842 (1.4%) |  |
| Age at BC death | Mean (SD) | 70.0 (6.3) | 69.9 (6.4) | 70.0 (6.3) | 0.5694 |
| Median (IQR) | 70.6 (65.4-75.3) | 70.6 (65.4-75.2) | 70.5 (65.4-75.3) | 0.7088 |
| Time from BC diagnosis to BC death | Mean (SD) | 5.2 (4.3) | 5.4 (4.3) | 5.1 (4.4) | <.0001 |
| Median (IQR) | 3.9 (1.9-7.4) | 4.1 (2.1-7.6) | 3.7 (1.8-7.2) | <.0001 |
| Other cause of death | No | 1,754,448 (64.3%) | 877,012 (64.3%) | 877,436 (64.3%) | 0.592 |
| Yes | 973,144 (35.7%) | 486,784 (35.7%) | 486,360 (35.7%) |  |
| Age at other COD | Mean (SD) | 71.3 (6.7) | 71.3 (6.7) | 71.3 (6.7) | 0.8246 |
| Median (IQR) | 72.8 (66.8-76.9) | 72.8 (66.8-76.9) | 72.8 (66.8-76.9) | 0.6306 |
| Vital status | Alive | 1,716,957 (62.9%) | 858,363 (62.9%) | 858,594 (63.0%) | 0.5462 |
| Breast | 37,491 (1.4%) | 18,649 (1.4%) | 18,842 (1.4%) |  |
| Other COD | 973,144 (35.7%) | 486,784 (35.7%) | 486,360 (35.7%) |  |
| Follow-up time | Mean (SD) | 21.8 (6.4) | 21.8 (6.4) | 21.8 (6.4) | 0.71 |
| Median (IQR) | 23.1 (20.1-26.3) | 23.1 (20.1-26.3) | 23.1 (20.1-26.3) | 0.9641 |

**Table S3.** Simulated cohort of 100,000 women under the preventive model (HR = 0.80)

|  | **Value** | **Total** | **Ever mammogram** | **Never Mammogram** | **P-value** |
| --- | --- | --- | --- | --- | --- |
|  |  | 100,000 | 45,545 (45.5%) | 54,455 (54.5%) |  |
| Breast cancer | Yes | 11,109 (11.1%) | 3,812 (8.4%) | 7,297 (13.4%) | <.0001 |
| Age at breast cancer diagnosis | <50 | 2,369 (21.3%) | 0 (0.0%) | 2,369 (32.5%) | <.0001 |
| 50-59 | 2,622 (23.6%) | 749 (19.6%) | 1,873 (25.7%) |  |
| 60-69 | 3,268 (29.4%) | 1,684 (44.2%) | 1,584 (21.7%) |  |
| 70-80 | 2,850 (25.7%) | 1,379 (36.2%) | 1,471 (20.2%) |  |
| Age at first mammogram | Mean (SD) | 54.9 (2.9) | 54.9 (2.9) | – | n/a |
| Median (IQR) | 54.9 (52.4-57.4) | 54.9 (52.4-57.4) | – |  |
| Age at last mammogram | Mean (SD) | 67.8 (3.2) | 67.8 (3.2) | – | n/a |
| Median (IQR) | 68.8 (68.2-69.4) | 68.8 (68.2-69.4) | – |  |
| Vital status | Alive | 58,942 (58.9%) | 28,744 (63.1%) | 30,198 (55.5%) | <.0001 |
| Breast | 2,086 (2.1%) | 544 (1.2%) | 1,542 (2.8%) |  |
| Other COD | 38,972 (39.0%) | 16,257 (35.7%) | 22,715 (41.7%) |  |
| Age at death from breast cancer | Mean (SD) | 61.6 (12.2) | 70.2 (6.3) | 58.6 (12.3) | <.0001 |
| Median (IQR) | 63.2 (53.1-71.6) | 70.7 (65.9-75.4) | 59.0 (49.8-68.6) | <.0001 |
